# Supplementary material for: Sub-Diffraction Optical Confinement for Enhanced Second-Harmonic Generation in Suspended Thin-Film Lithium Niobate Nano-Cavity
Source: Research Square preprint supplement (doi:10.21203/rs.3.rs-7099338/v1), 2025-07-17
Supplement: Supplementary file 1 [file ce76dbbc4415ffd0b4528b96.pdf]

# Supplementary Information for Sub-Diffraction Optical Confinement for Enhanced Second-Harmonic Generation in Suspended Thin-Film Lithium Niobate Nano-Cavity

Zengya Li<sup>1,2,†</sup>, Zhuoran Hu<sup>1,2,†</sup>, Weihao Wu<sup>1,2</sup>, Guangfeng Wang<sup>1,2</sup>, Hao Li<sup>1,2</sup>,  
Shijie Liu<sup>1,2</sup>, Bo Wang<sup>1,2</sup>, Yuanlin Zheng<sup>1,2,3,\*</sup>, Xianfeng Chen<sup>1,2,3,4,\*</sup>

<sup>1</sup>State Key Laboratory of Micro-Nano Engineering Science, School of Physics and Astronomy,  
Shanghai Jiao Tong University, Shanghai 200240, China.

<sup>2</sup>State Key Laboratory of Photonics and Communications, Shanghai Jiao Tong University, Shanghai  
200240, China

<sup>3</sup>Shanghai Research Center for Quantum Sciences, Shanghai 201315, China.

<sup>4</sup>Collaborative Innovation Center of Light Manipulations and Applications,  
Shandong Normal University, Jinan 250358, China

\*Corresponding author. Email: ylzhen@sjtu.edu.cn; xfchen@sjtu.edu.cn

<sup>†</sup>These authors contribute equally to this work.

## 1. Electric field analysis of sub-diffraction suspended dielectric cavities

The suspended circular Bragg gratings are engineered with a tailored radial period to support resonant operation across the 1250–1500 nm wavelength range. Starting from nonlinear Maxwell's equations and assuming a time-harmonic electric field of the form  $\mathbf{E}(\mathbf{r}, t) = \mathbf{E}(\mathbf{r})e^{-i\omega t}$ .

In the absence of electrostatic interactions—that is, neglecting the free charge density ( $\rho_f = 0$ ) and the free current density ( $\mathbf{J}_f = 0$ )—the nonlinear Maxwell's equations can be simplified under the high-frequency approximation (e.g., in the optical regime) as follows:

$$\begin{aligned}\nabla \cdot \mathbf{D} &= 0 \\ \nabla \cdot \mathbf{B} &= 0 \\ \nabla \times \mathbf{E} &= -\frac{\partial \mathbf{B}}{\partial t} \\ \nabla \times \mathbf{H} &= \frac{\partial \mathbf{D}}{\partial t}\end{aligned}\tag{S1}$$

478 In Eqn. S1,  $\mathbf{D}$  and  $\mathbf{H}$  are electric displacement field and magnetic fields of the eigenmodes, respec-  
 479 tively, and  $t$  represents time. The solution form of Maxwell's equations in cylindrical coordinates  
 480 is given in Eqn. S2.

$$\left[ \frac{\partial^2}{\partial \rho^2} + \frac{1}{\rho} \frac{\partial}{\partial \rho} + \frac{1}{\rho^2} \frac{\partial^2}{\partial \varphi^2} \right] \mathbf{E}_j^{(\omega)} = -\mu_0 \omega^2 \mathbf{D}_j^{(\omega)} \quad (\text{S2})$$

$$\left( \frac{\partial \mathbf{D}_z}{\partial \rho} + \frac{1}{\rho} \frac{\partial \mathbf{D}_y}{\partial \varphi} \right) \cos \varphi + \left( \frac{\partial \mathbf{D}_y}{\partial \rho} - \frac{1}{\rho} \frac{\partial \mathbf{D}_z}{\partial \varphi} \right) \sin \varphi = 0$$

481 Under the condition that only second-order nonlinear effects are considered, the components of  
 482 the electric displacement field can be described as  $D_x$ ,  $D_y$ , and  $D_z$ , satisfying Eqn. S3.

$$\begin{pmatrix} \mathbf{D}_x \\ \mathbf{D}_y \\ \mathbf{D}_z \end{pmatrix} = \varepsilon_0 \begin{pmatrix} \varepsilon_{xx} & \varepsilon_{yx} & \varepsilon_{zx} \\ \varepsilon_{xy} & \varepsilon_{yy} & \varepsilon_{zy} \\ \varepsilon_{xz} & \varepsilon_{yz} & \varepsilon_{zz} \end{pmatrix} \begin{pmatrix} \mathbf{E}_x \\ \mathbf{E}_y \\ \mathbf{E}_z \end{pmatrix} + \varepsilon_0 \begin{pmatrix} \sum_{j,k} \chi_{xjk}^{(2)} \mathbf{E}_j \mathbf{E}_k \\ \sum_{j,k} \chi_{yjk}^{(2)} \mathbf{E}_j \mathbf{E}_k \\ \sum_{j,k} \chi_{zjk}^{(2)} \mathbf{E}_j \mathbf{E}_k \end{pmatrix} \quad (\text{S3})$$

483 Lithium niobate is a negative uniaxial crystal (point group  $3m$ ). Its linear dielectric tensor in  
 484 the crystal axis coordinate system is a diagonal matrix:

$$\boldsymbol{\varepsilon} = \begin{pmatrix} \varepsilon_{xx} & 0 & 0 \\ 0 & \varepsilon_{yy} & 0 \\ 0 & 0 & \varepsilon_{zz} \end{pmatrix} \quad (\text{S4})$$

485 The last term in Eqn. S3 corresponds to the second-order nonlinear polarization, which can be  
 486 expressed as

$$\mathbf{P}_i^{(2)}(2\omega) = \varepsilon_0 \sum_{j,k} \chi_{ijk}^{(2)} \mathbf{E}_j(\omega) \mathbf{E}_k(\omega) \quad (\text{S5})$$

487 where  $\chi_{ijk}^{(2)}$  denotes the elements of the second-order nonlinear susceptibility tensor, and  $\mathbf{E}_j(\omega)$ ,  
 488  $\mathbf{E}_k(\omega)$  are the components of the fundamental electric field at frequency  $\omega$ .

$$\begin{pmatrix} \mathbf{P}_x^{(2)} \\ \mathbf{P}_y^{(2)} \\ \mathbf{P}_z^{(2)} \end{pmatrix} = 2\varepsilon_0 \begin{pmatrix} d_{11} & d_{21} & d_{31} & d_{14} & d_{15} & d_{16} \\ d_{12} & d_{22} & d_{32} & d_{24} & d_{25} & d_{26} \\ d_{13} & d_{23} & d_{33} & d_{34} & d_{35} & d_{36} \end{pmatrix} \begin{pmatrix} \mathbf{E}_x(\omega) \mathbf{E}_x(\omega) \\ \mathbf{E}_y(\omega) \mathbf{E}_y(\omega) \\ \mathbf{E}_z(\omega) \mathbf{E}_z(\omega) \\ 2\mathbf{E}_y(\omega) \mathbf{E}_z(\omega) \\ 2\mathbf{E}_x(\omega) \mathbf{E}_z(\omega) \\ 2\mathbf{E}_x(\omega) \mathbf{E}_y(\omega) \end{pmatrix} \quad (\text{S6})$$

489 For lithium niobate (point group  $3m$ ), the nonzero  $d$  components are:

$$d_{31} = d_{32} \neq 0, \quad d_{33} \neq 0, \quad d_{15} = d_{24} \neq 0 \quad (\text{S7})$$

490 Therefore, the nonlinear polarization terms can be further simplified as:

$$\begin{aligned} \mathbf{P}_x^{(2)} &= 2d_{15}\mathbf{E}_y\mathbf{E}_z \\ \mathbf{P}_y^{(2)} &= 2d_{15}\mathbf{E}_x\mathbf{E}_z \\ \mathbf{P}_z^{(2)} &= d_{31}(\mathbf{E}_x^2 + \mathbf{E}_y^2) + d_{33}\mathbf{E}_z^2 \end{aligned} \quad (\text{S8})$$

491 The substitution of Eqn. S8 into Eqn. S3 yields the nonlinear polarization component  $[\mathbf{D}_x(\omega),$   
492  $\mathbf{D}_y(\omega), \mathbf{D}_z(\omega)]$  as:

$$\begin{pmatrix} \mathbf{D}_x(\omega) \\ \mathbf{D}_y(\omega) \\ \mathbf{D}_z(\omega) \end{pmatrix} = \varepsilon_0 \begin{pmatrix} \varepsilon_{xx}(\omega)\mathbf{E}_x(\omega) + 2d_{15}\mathbf{E}_y(\omega)\mathbf{E}_z(\omega) \\ \varepsilon_{yy}(\omega)\mathbf{E}_y(\omega) + 2d_{15}\mathbf{E}_x(\omega)\mathbf{E}_z(\omega) \\ \varepsilon_{zz}(\omega)\mathbf{E}_z(\omega) + d_{31}(\mathbf{E}_x^2(\omega) + \mathbf{E}_y^2(\omega)) + d_{33}\mathbf{E}_z^2(\omega) \end{pmatrix} \quad (\text{S9})$$

493 The second-order nonlinear optical effects are considered as higher-order perturbations in the  
494 electromagnetic field analysis. Therefore, in this work, we assume the second-order nonlinear  
495 susceptibility tensor components  $d_{33}$ ,  $d_{31}$ , and  $d_{15}$  to be zero.

$$\begin{pmatrix} \mathbf{D}_x(\omega) \\ \mathbf{D}_y(\omega) \\ \mathbf{D}_z(\omega) \end{pmatrix} = \varepsilon_0 \begin{pmatrix} \varepsilon_{xx}(\omega)\mathbf{E}_x(\omega) \\ \varepsilon_{yy}(\omega)\mathbf{E}_y(\omega) \\ \varepsilon_{zz}(\omega)\mathbf{E}_z(\omega) \end{pmatrix} \quad (\text{S10})$$

496 Substituting Eqn. S10 into Eqn. S2 yields Eqn. S11.

$$\left\{ \begin{aligned} &\left[ \frac{\partial^2}{\partial \rho^2} + \frac{1}{\rho} \frac{\partial}{\partial \rho} + \frac{1}{\rho^2} \frac{\partial^2}{\partial \varphi^2} \right] \mathbf{E}_i^{(\omega)} = -\frac{\omega^2}{c^2} n_{ii}^2(\omega) \mathbf{E}_i^{(\omega)} \\ &\left[ \frac{\partial}{\partial \rho} \left( n_{zz}^2(\omega) \mathbf{E}_z(\omega) \right) + \frac{1}{\rho} \frac{\partial}{\partial \varphi} \left( n_{yy}^2(\omega) \mathbf{E}_y(\omega) \right) \right] \cos \varphi \\ &\quad + \left[ \frac{\partial}{\partial \rho} \left( n_{yy}^2(\omega) \mathbf{E}_y(\omega) \right) - \frac{1}{\rho} \frac{\partial}{\partial \varphi} \left( n_{zz}^2(\omega) \mathbf{E}_z(\omega) \right) \right] \sin \varphi = 0 \end{aligned} \right. \quad (\text{S11})$$

497 In the Eqn. S11, the anisotropic permittivity components  $\varepsilon_{yy}(\omega)$  and  $\varepsilon_{zz}(\omega)$  appear explicitly.  
498 These can be equivalently expressed in terms of the refractive indices  $n_{yy}(\omega)$  and  $n_{zz}(\omega)$  via the  
499 relation in Eqn. S12.

$$\varepsilon_{ii}(\omega) = n_{ii}^2(\omega), \quad i = x, y, z \quad (\text{S12})$$

500 We assume that each component of the electric field can be expressed in a separable form as

$$E_i^{(\omega)}(\rho, \varphi) = R_i(\rho) \Phi_i(\varphi) \quad (\text{S13})$$

501 where  $R_i(\rho)$  and  $\Phi_i(\varphi)$  represent the radial and angular components of the electric field, respec-  
 502 tively. Due to the inherent periodicity of the angular coordinate  $\varphi$  (with period  $2\pi$ ), the angular  
 503 function  $\Phi_i(\varphi)$  is chosen as

$$\Phi_i(\varphi) = e^{im_i\varphi}, \quad m_i \in \mathbb{Z} \quad (\text{S14})$$

504 where  $m_i$  is an integer ensuring the single-valuedness and periodicity of the wavefunction. Substi-  
 505 tuting the separated variables into the first equation yields

$$\frac{1}{R_i} \left( \frac{d^2 R_i}{d\rho^2} + \frac{1}{\rho} \frac{dR_i}{d\rho} \right) - \frac{m_i^2}{\rho^2} = -\frac{\omega^2}{c^2} n_{ii}^2(\omega) \quad (\text{S15})$$

506 By algebraic manipulation, we obtain the radial differential equation

$$\frac{d^2 R_i}{d\rho^2} + \frac{1}{\rho} \frac{dR_i}{d\rho} + \left[ k_i^2 - \frac{m_i^2}{\rho^2} \right] R_i = 0 \quad (\text{S16})$$

507 where

$$k_i = \frac{\omega}{c} n_{ii}(\omega) \quad (\text{S17})$$

508 Eqn. S16 is the standard Bessel equation, whose general solution can be expressed as a linear  
 509 combination of Bessel functions:

$$R_i(\rho) = A_i J_{m_i}(k_i \rho) + B_i Y_{m_i}(k_i \rho) \quad (\text{S18})$$

510 where  $J_{m_i}(k_i \rho)$  is the first kind Bessel function, and  $Y_{m_i}(k_i \rho)$  is the second kind Bessel function  
 511 (also known as the Neumann function). The constants  $A_i$  and  $B_i$  are determined by boundary  
 512 conditions.

513 **Regular case without singularities.** In typical cylindrical geometries where the domain includes  
 514 the origin ( $\rho = 0$ ) and no geometric singularity is present, the solution to the radial equation must  
 515 be finite at  $\rho = 0$ . Since the second kind Bessel function,  $Y_{m_i}(k_i \rho)$ , diverges at the origin, the



516 physical requirement of regularity demands that its contribution be excluded. Thus, the general  
517 solution simplifies to:

$$R_i(\rho) = A_i J_{m_i}(k_i \rho) \quad (\text{S19})$$

518 where  $A_i$  is a constant determined by boundary conditions. In this case, the electric field remains  
519 finite.

520 **Case with bowtie-shaped singularities.** In contrast, when a bowtie-shaped singularity—such as  
521 a sharp metallic tip or a subwavelength dielectric gap—is present near or at  $\rho = 0$ , the center is no  
522 longer a regular point in the domain. Such geometric features introduce a physical or mathematical  
523 singularity that invalidates the regularity condition at the origin.

524 In this scenario, the solution to the radial equation must retain both Bessel functions:

$$R_i(\rho) = A_i J_{m_i}(k_i \rho) + B_i Y_{m_i}(k_i \rho) \quad (\text{S20})$$

525 where  $B_i$  takes nonzero values depending on the field behavior near the singularity. The divergent  
526 nature of  $Y_{m_i}$  at the origin is no longer unphysical, but may reflect genuine field enhancement  
527 arising from the singular structure. Such effects are particularly significant in dielectric nanogaps  
528 or nonlinear optical hotspots, where geometric singularities lead to localized field amplification.  
529 The higher-order small terms of the electric field can be neglected, and the eigenmodes  $\mathbf{E}$  and  $\mathbf{H}$   
530 can be expressed in Eqn. [S21](#).

$$\begin{cases}
\mathbf{E}_y = \begin{cases} \frac{\alpha}{\varepsilon_{yy}} C(k_0 \rho)^{-l} \cos[l\varphi], & -\frac{\theta}{2} \leq \varphi \leq \frac{\theta}{2} \\ \frac{\alpha}{\varepsilon_{yy}} C(k_0 \rho)^{-l} \cos[l(\pi - \varphi)], & \pi - \frac{\theta}{2} \leq \varphi \leq \pi + \frac{\theta}{2} \\ C(k_0 \rho)^{-l} \cos\left[l\left(\frac{\pi}{2} + \varphi\right)\right], & -\pi + \frac{\theta}{2} < \varphi < -\frac{\theta}{2} \\ C(k_0 \rho)^{-l} \cos\left[l\left(\frac{\pi}{2} - \varphi\right)\right], & \frac{\theta}{2} < \varphi < \pi - \frac{\theta}{2} \end{cases} \\
\mathbf{E}_z = \begin{cases} \frac{\alpha}{\varepsilon_{zz}} C(k_0 \rho)^{-l} \sin[l\varphi], & -\frac{\theta}{2} \leq \varphi \leq \frac{\theta}{2} \\ -\frac{\alpha}{\varepsilon_{zz}} C(k_0 \rho)^{-l} \sin[l(\pi - \varphi)], & \pi - \frac{\theta}{2} \leq \varphi \leq \pi + \frac{\theta}{2} \\ C(k_0 \rho)^{-l} \sin\left[l\left(\frac{\pi}{2} + \varphi\right)\right], & -\pi + \frac{\theta}{2} < \varphi < -\frac{\theta}{2} \\ -C(k_0 \rho)^{-l} \sin\left[l\left(\frac{\pi}{2} - \varphi\right)\right], & \frac{\theta}{2} < \varphi < \pi - \frac{\theta}{2} \end{cases} \\
\mathbf{E}_x = 0 \\
\mathbf{H}_x = \mathbf{H}_y = \mathbf{H}_z = 0
\end{cases} \quad (\text{S21})$$

531 The analytical solution suggests an infinite electric field intensity at the hotspot. Nevertheless,  
532 due to the impossibility of a zero gap distance in real structures, the field enhancement factor is  
533 ultimately finite.

## 534 2. Nonlinear coupling wave equation and SHG enhancement

535 In the absence of losses and under the slowly varying envelope approximation, the nonlinear coupled  
536 wave equations in the time-domain electromagnetic field can be expressed as shown in Eqn. S22.

$$\begin{cases} \frac{d\tilde{\alpha}_1}{dt} = -i\beta_1 \tilde{\alpha}_1^* \tilde{\alpha}_2 e^{-i(\omega_2 - 2\omega_1)t} \\ \frac{d\tilde{\alpha}_2}{dt} = i\beta_2 \tilde{\alpha}_1^2 e^{-i(2\omega_1 - \omega_2)t} \end{cases} \quad (\text{S22})$$

537 In Eqn. (S22),  $\tilde{\alpha}_1$  and  $\tilde{\alpha}_2$  denote the complex slowly varying amplitudes of the coupled waves  
538 at frequencies  $\omega_1$  and  $\omega_2$ , respectively,  $g$  represents the nonlinear coupling coefficient,  $\omega_1$  and  $\omega_2$   
539 are the angular frequencies of the modes, the asterisk  $*$  denotes the complex conjugate.

540 Taking into account losses and input excitation, the nonlinear coupled wave equations are given  
 541 in Eqn. S23.

$$\begin{cases} \frac{d\tilde{\alpha}_1}{dt} = -\frac{\kappa_{10} + \kappa_{1e}}{2}\tilde{\alpha}_1 + \sqrt{\kappa_{1e}}s e^{-i(\omega_p - \omega_1)t} - i\beta_1 \tilde{\alpha}_1^* \tilde{\alpha}_2 e^{-i(\omega_2 - 2\omega_1)t} \\ \frac{d\tilde{\alpha}_2}{dt} = -\frac{\kappa_{20} + \kappa_{2e}}{2}\tilde{\alpha}_2 + i\beta_2 \tilde{\alpha}_1^2 e^{-i(2\omega_1 - \omega_2)t} \end{cases} \quad (\text{S23})$$

542 where  $\omega_p$  and  $s$  denote the frequency and the amplitude of the input electric field in the pump fibre,  
 543 with  $|s|^2$  being the input power,  $\kappa_{j0}$  and  $\kappa_{je}$  represent the intrinsic decay rate and external coupling  
 544 rate, respectively. Under the assumption of solely second-order nonlinear effects, the nonlinear  
 545 coupling coefficients  $\beta_1$  and  $\beta_2$  are defined as presented in Eqn. S24<sup>45</sup>.

$$\begin{cases} \beta_1 = \frac{1}{4} \frac{\int d^3x \sum_{ijk} \varepsilon \chi_{ijk}^{(2)} (\mathbf{E}_{1i}^* \mathbf{E}_{2j} \mathbf{E}_{1k}^* + \mathbf{E}_{1j}^* \mathbf{E}_{2k} \mathbf{E}_{1i}^*)}{(\int d^3x \varepsilon |\mathbf{E}_1|^2) (\int d^3x \varepsilon |\mathbf{E}_2|^2)^{1/2}} \\ \beta_2 = \frac{1}{4} \frac{\int d^3x \sum_{ijk} \varepsilon \chi_{ijk}^{(2)} \mathbf{E}_{2i}^* \mathbf{E}_{1j} \mathbf{E}_{1k}}{(\int d^3x \varepsilon |\mathbf{E}_1|^2) (\int d^3x \varepsilon |\mathbf{E}_2|^2)^{1/2}} \end{cases} \quad (\text{S24})$$

546 In the rotating frame of the pump,  $\alpha_1 = \tilde{\alpha}_1 e^{i(\omega_p - \omega_1)t}$  and  $\alpha_2 = \tilde{\alpha}_2 e^{i(2\omega_p - \omega_2)t}$ , the coupled wave  
 547 equations can be expressed in Eqn. S25.

$$\begin{cases} \frac{d\alpha_1}{dt} = \left[ i(\omega_p - \omega_1) - \frac{\kappa_{10} + \kappa_{1e}}{2} \right] \alpha_1 + \sqrt{\kappa_{1e}}s - i\beta_1 \alpha_1^* \alpha_2 \\ \frac{d\alpha_2}{dt} = \left[ i(2\omega_p - \omega_2) - \frac{\kappa_{20} + \kappa_{2e}}{2} \right] \alpha_2 + i\beta_2 \alpha_1^2 \end{cases} \quad (\text{S25})$$

548 The pump is almost unperturbed by SHG, since the pump light is much stronger than the SH  
 549 signal. Therefore, the last term in Eqn. S25 can be ignored in the following analysis. Considering  
 550 the steady state, i.e.,  $\frac{d\tilde{\alpha}_1}{dt} = \frac{d\tilde{\alpha}_2}{dt} = 0$ , the above coupled mode equations result in the expression of  
 551 generated SH power<sup>46</sup>,

$$P_2 = \frac{4|\beta|^2 Q_2^2}{\omega_2 Q_{2e} \left[ 4Q_2^2 \left( \frac{2\omega_p}{\omega_2} - 1 \right)^2 + 1 \right]} \cdot \frac{16Q_1^4}{Q_{1e}^2 \omega_1^2 \left[ 4Q_1^2 \left( \frac{\omega_p}{\omega_1} - 1 \right)^2 + 1 \right]^2} P_1^2 \quad (\text{S26})$$

552 Here,  $Q_j = \frac{\omega_j}{\kappa_{j0} + \kappa_{je}}$  and  $Q_{je} = \frac{\omega_j}{\kappa_{je}}$  denote the loaded quality factor and the external (coupling-  
 553 induced) quality factor, respectively. Under the phase-matching condition, i.e.,  $\omega_p = \omega_1 = \omega_2/2$ ,  
 554 and assuming critical coupling ( $Q_j = Q_{je}$ ), the conversion efficiency scales as  $\frac{P_2}{P_1^2} \propto Q_2 Q_1^2 |\beta|^2$ .

From Eqn. S24, we can derive the relationship between the mode volume  $V_m$  and the coupling coefficients. In this case, any integral over the fields will simply yield the mode volume  $V_m$  of the nonlinear material. Thus, for the  $\chi^{(2)}$  effect, we obtain  $\beta_i \sim g \frac{\chi^{(2)}}{\sqrt{V_m}}$ , where  $g$  represents the coupling coefficient into the cavity. In fact, although the calculated mode volume is very small, the overall enhancement factor does not increase significantly because the coupling coefficient between the Gaussian beam and the nanocavity is quite small, resulting in a relatively small value of  $g$ .

### 3. Fabrication of suspended CBGs and bowtie structures in suspended CBG

The fabrication process of the suspended CBG structure with an integrated bowtie consists of several steps, as illustrated in Fig. S1. Firstly, a 600-nm-thick amorphous silicon is deposited on the TFLN wafer via plasma-enhanced chemical vapor deposition (PECVD), followed by spin-coating of ZEP520A electron beam resist. The designed patterns are then exposed by electron beam lithography and developed by pentyl acetate. Subsequently, the pattern is transferred to the silicon layer using inductively coupled plasma reactive ion etching (ICP-RIE). The underlying TFLN is further etched via ICP to form the nanostructures. Afterward, the silicon hard mask is removed, and selective wet etching of the buried  $\text{SiO}_2$  layer is performed to release the suspended structure.

### 4. Experimental setup for reflection measurement

As shown in Fig. S2, the light source is a picosecond supercontinuum laser with a pulse duration of 220 ps (YSL photonics SC-pro, repetition rate: 20 MHz). The supercontinuum is firstly filtered by a long-pass filter ( $>1250$  nm). The input light is then tightly focused on the sample by a NIR microscope objective (Mitutoyo 50 $\times$ , NA = 0.65). Reflection light is collected by the same objective and reflected by a beam splitter (50:50, 600–1700 nm). A flip mirror is added after the beam splitter to guide the beam into two arms. The light is either coupled into a multimode fiber and recorded by a spectrometer (Anritsu, MS9740A) or imaged using a camera (EMCCD, iXon Ultra 897).

### 5. Experimental setup for SHG enhancement

As shown in Fig. S3, during the SHG signal measurement, the supercontinuum source is spectrally filtered using a tunable high-power filter (YSL Photonics AOTF-PRO2, FWHM 1.9 nm). The

581 output beam then passes through a Glan prism and half-wave plate (@1310 nm) to adjust the  
582 polarization of the excitation light. Afterward, the beam is directed through two beam splitters (BS)  
583 and a microscope objective, tightly focused onto the center of the sample. The reflected signal is  
584 redirected by the same plate beam splitter to a EMCCD camera (iXon Ultra 897) for measuring the  
585 SHG intensity of the sample, or alternatively, coupled into a spectrometer (Ocean Optics, HR4000)  
586 via a fiber coupling system to analyze the SHG spectrum.

## 587 **6. Design of suspended CBGs and bowtie structures in suspended CBG**

588 The sample is simulated using the finite-difference time-domain (FDTD) method. To enhance the  
589 refractive index contrast, suspended supports are designed within the circular Bragg cavity, as  
590 shown in Fig. S4. The size of the supporting structures is minimized—down to 90 nm—to ensure  
591 sufficient mechanical stability while preventing the collapse of the sample.

592 By tuning the period and duty cycle of the sample, different resonant structures can be engi-  
593 neered. Using the FDTD method, structures with periods ranging from 720 to 840 nm and duty  
594 cycles between 0.58 and 0.66 are designed. The resonance wavelength can be shifted by adjusting  
595 the period (Fig. S5-S8). Considering that the etching angle depends on both the grating period and  
596 duty cycle, the designed resonances are centered at around 1310 nm.

## 597 **7. Discussion of electric field distributions of bowtie with different gap sizes**

598 The electric field distribution within the bowtie structure is strongly influenced by the gap size. As  
599 the gap narrows, the electromagnetic coupling between the two dielectric tips intensifies, leading to  
600 a significant increase in the local field enhancement at the dielectric gap (Fig. S9). This enhanced  
601 confinement can greatly improve nonlinear optical effects like SHG.

602 However, reducing the gap size also presents fabrication challenges and may introduce additional  
603 losses or scattering due to imperfections. The field confinement becomes more spatially localized  
604 in smaller gaps, requiring high fabrication precision to fully utilize the enhancement. In our work,  
605 the fabrication limit of the gap size is 20 nm (Fig. S10).

## 606 8. Discussion of related work

607 Bowtie nanostructure integrated within a suspended circular Bragg cavity has been experimentally  
608 and theoretically designed, enabling giant SHG enhancement beyond the diffraction limit. The  
609 information of the fundamental and second harmonic signals is shown in Tables S1 and S2. The  
610 CBG nanocavity achieves a high normalized conversion efficiency of  $0.85 \times 10^{-2} \text{ cm}^2/\text{GW}$  under  
611 a pump intensity of  $1 \text{ MW}/\text{cm}^2$ , with a mode volume as small as  $7.58 \times 10^{-4} (\lambda/n)^3$ . An SHG  
612 enhancement factor of 3,720 is achieved compared to bare TFLN. Efficient SHG under ultralow  
613 pump intensities is also demonstrated, significantly improving both the device performance and  
614 operational lifetime, while simultaneously reducing the mode volume.

615 In contrast to plasmonic resonances, the bowtie-integrated CBG structure is free from thermal  
616 losses and supports higher optical powers, significantly extending the upper limit of nonlinear  
617 conversion efficiency while maintaining an ultrasmall mode volume. Furthermore, compared to  
618 other all-dielectric nanostructures, our design exhibits a significantly reduced mode volume while  
619 maintaining a high SHG efficiency. The comparison is shown in Fig. 5H and Table S3. Notably,  
620 this work represents the first experimental realization of a nonlinear optical response beyond the  
621 diffraction limit in a all-dielectric nanocavity.

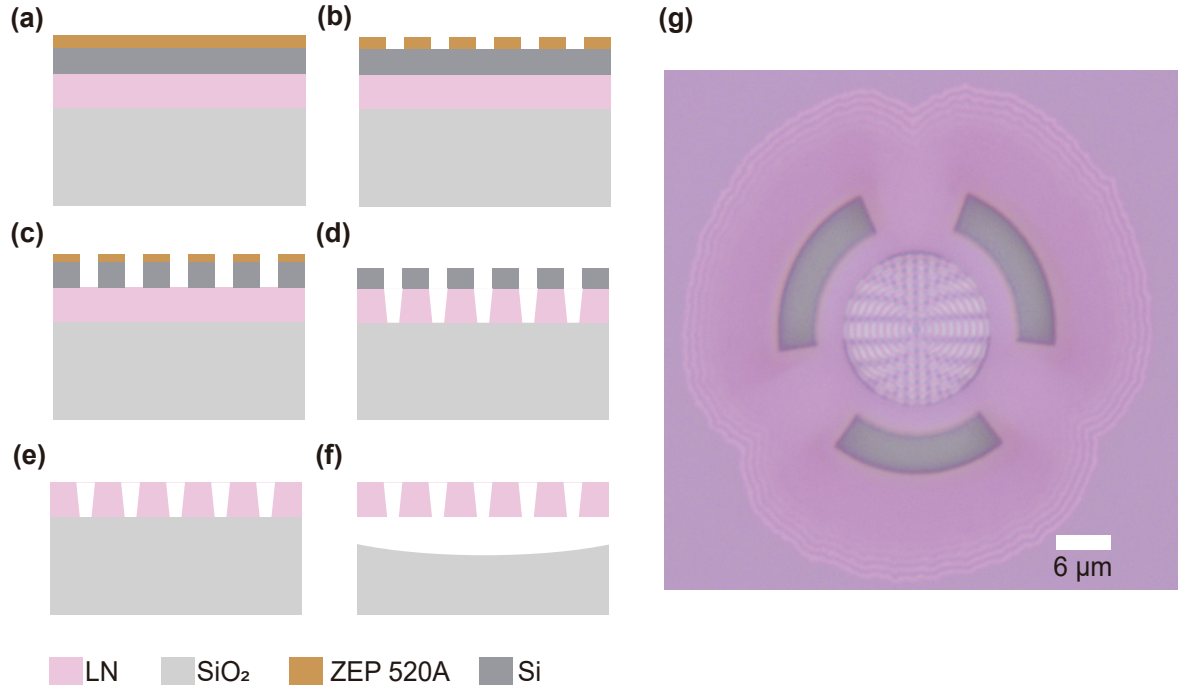

**Figure S1: Fabrication flowchart of the sample.** (a) Deposition of 600-nm amorphous silicon on TFLN via PECVD, followed by spin coating of ZEP520A photoresist. (b) Electron beam exposure and development. (c) ICP-RIE etching of silicon mask. (d) RIE etching of LN. (e) Removal of silicon. (f) Selective etching of silicon dioxide. (g) Optical microscope image of the sample.

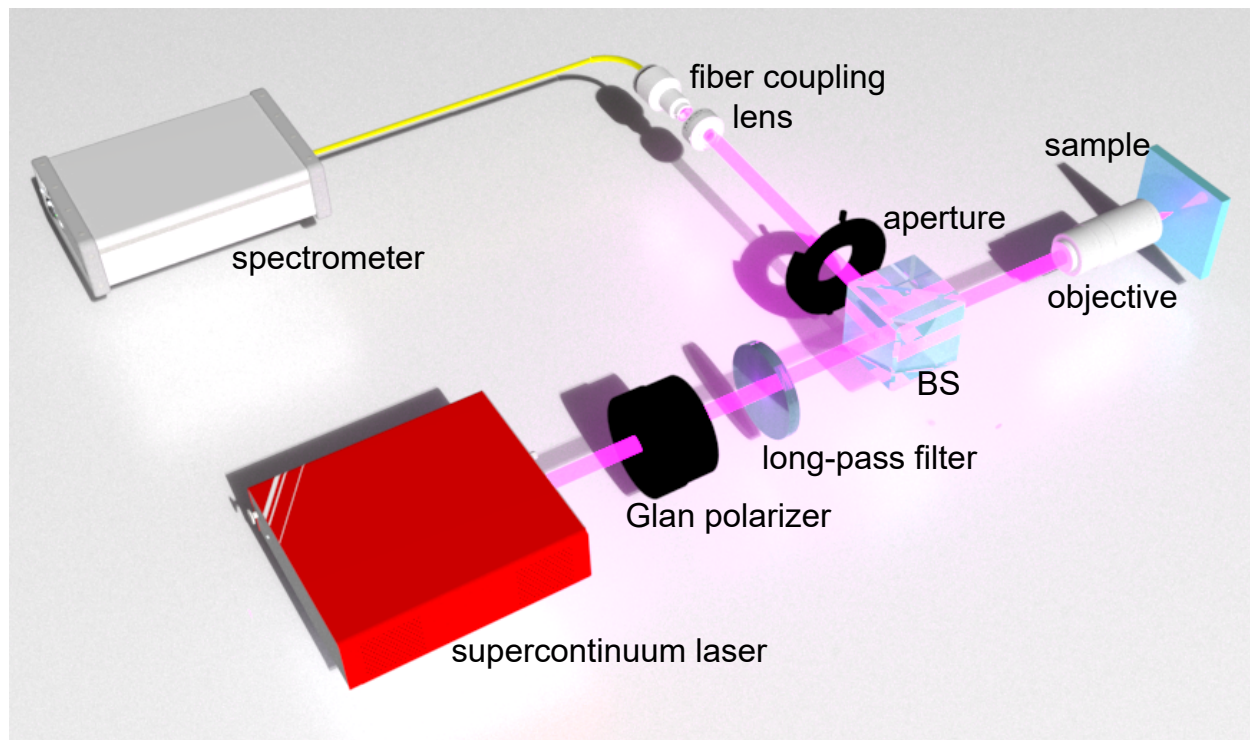

**Figure S2: Experimental setup for reflection measurement.** The supercontinuum laser (YSL photonics SC-pro, 430–2400 nm) passes a Glan polarizer for polarization control. Then, it is filtered by a long-pass filter ( $>1250$  nm), to avoid the intense seed at 1064 nm. The input light is then tightly focused on the sample by a NIR microscope objective (Mitutoyo, 50 $\times$ , NA=0.65). The reflection signal is collected by the same objective and reflected by a beam splitter (50:50, 600–1700 nm). The reflection signal is coupled into a single-mode optical fiber (the coupling efficiency is 30%) and recorded by a spectrometer (Anritsu, MS9740A).



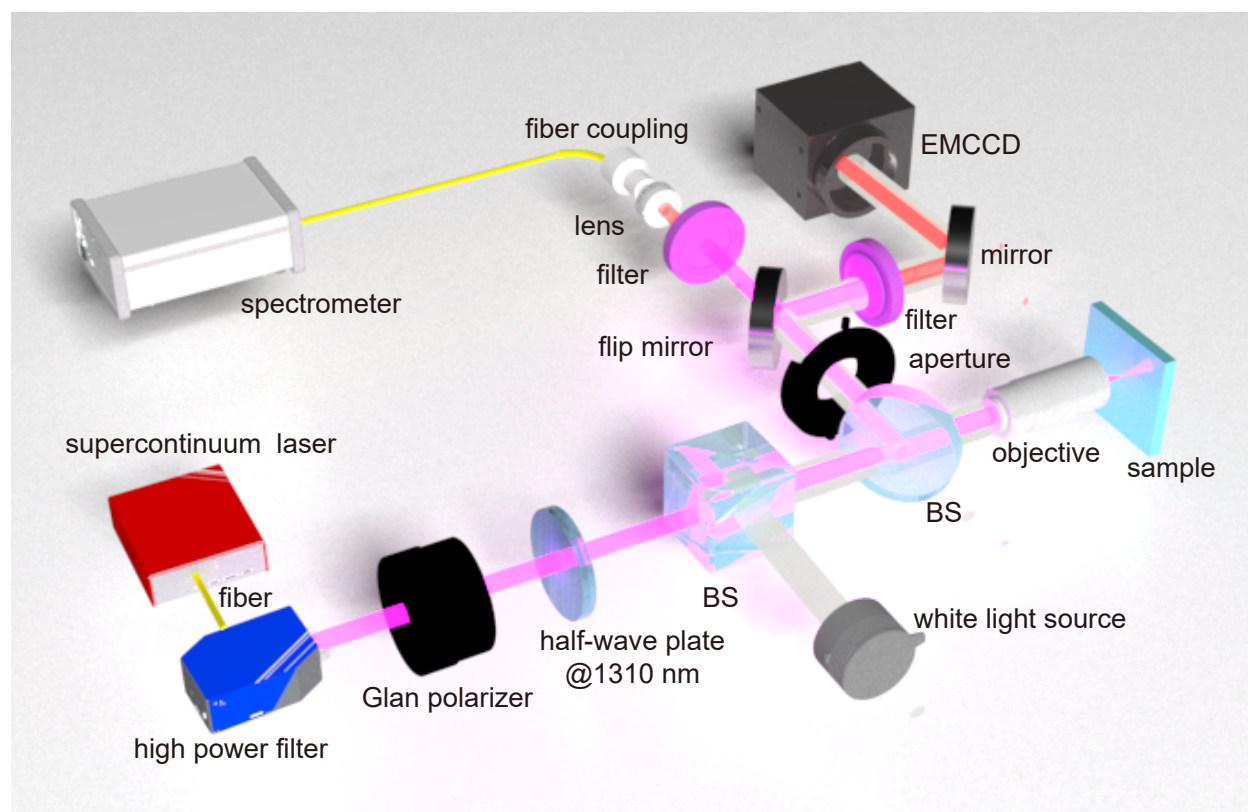

**Figure S3: Experimental setup for SHG enhancement.** During the SHG signal measurement, the supercontinuum source is spectrally filtered using a tunable high-power filter (YSL Photonics AOTF-PRO2, FWHM 1.9 nm). The output beam then passes through a Glan prism and half-wave plate (@1310 nm) to adjust the polarization of the excitation light. Afterward, the beam is directed through two beam splitters (BS) and a microscope objective, tightly focused onto the center of the sample. The reflected signal is redirected by the same plate beam splitter to a EMCCD camera (iXon Ultra 897) for measuring the SHG intensity of the sample, or alternatively, coupled into a spectrometer (Ocean Optics, HR4000) via a fiber coupling system to analyze the SHG spectrum.

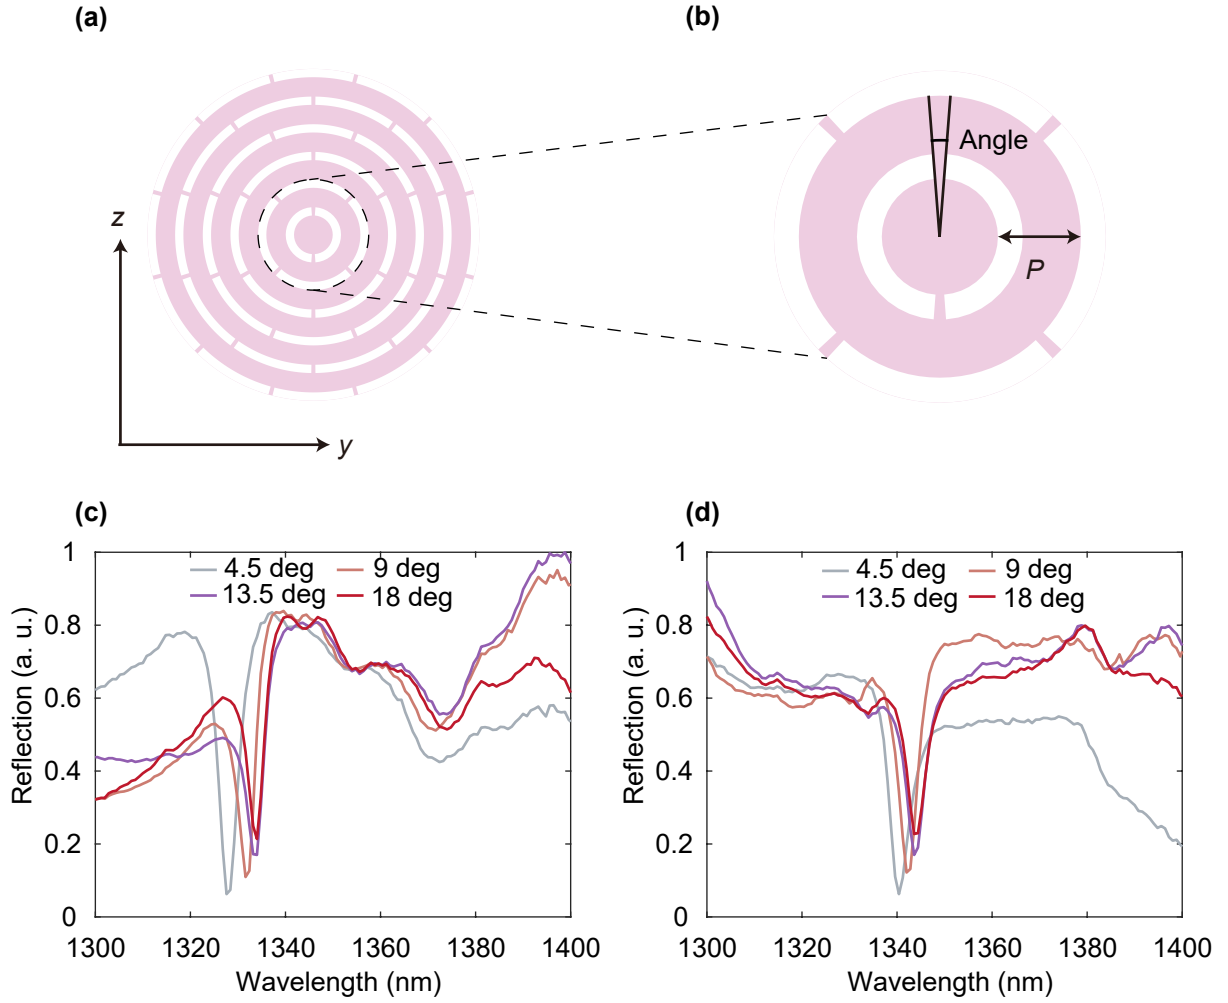

**Figure S4: Influence of the width of the suspended supports on the resonance.** (a and b) Schematics of the suspended supports in the CBG, illustrating that smaller angles correspond to reduced support size. (c and d) Reflection spectra under z-polarized and y-polarized pump excitation. A decrease in angle leads to an increased  $Q$  factor.

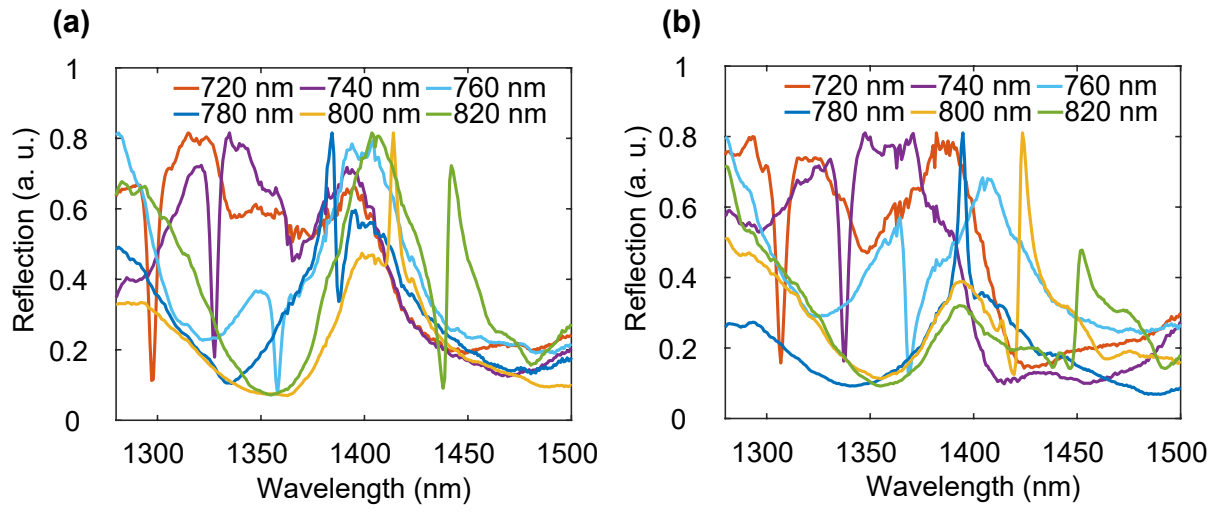

**Figure S5:** Experimental reflection spectra of suspended CBGs with different  $P$  values under (a) z-polarized and (b) y-polarized illumination.

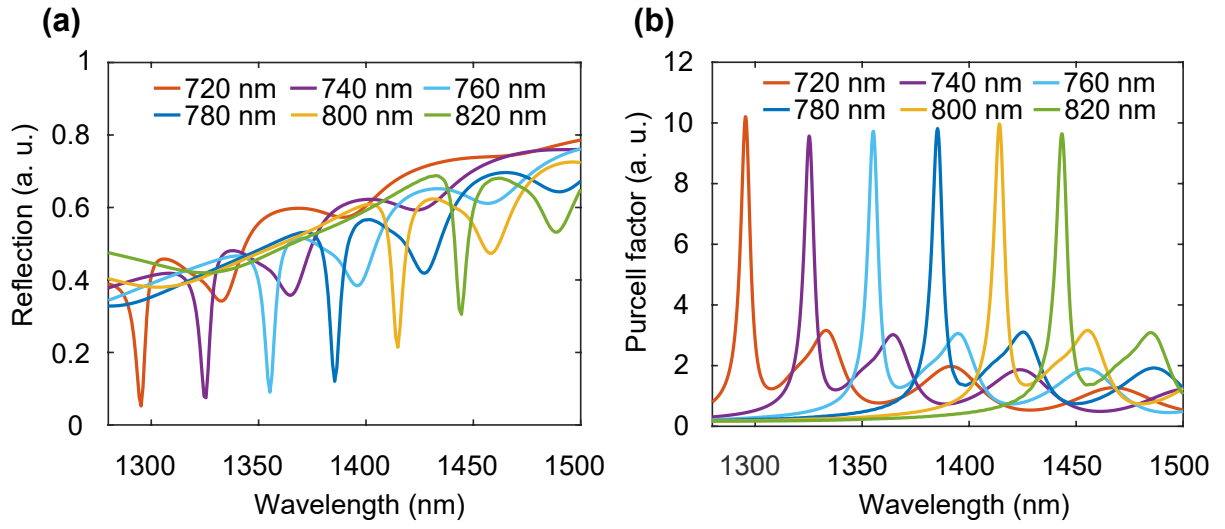

**Figure S6:** (a) Simulated reflection spectra of the suspended CBG under z-polarized illumination and (b) the corresponding Purcell factors.

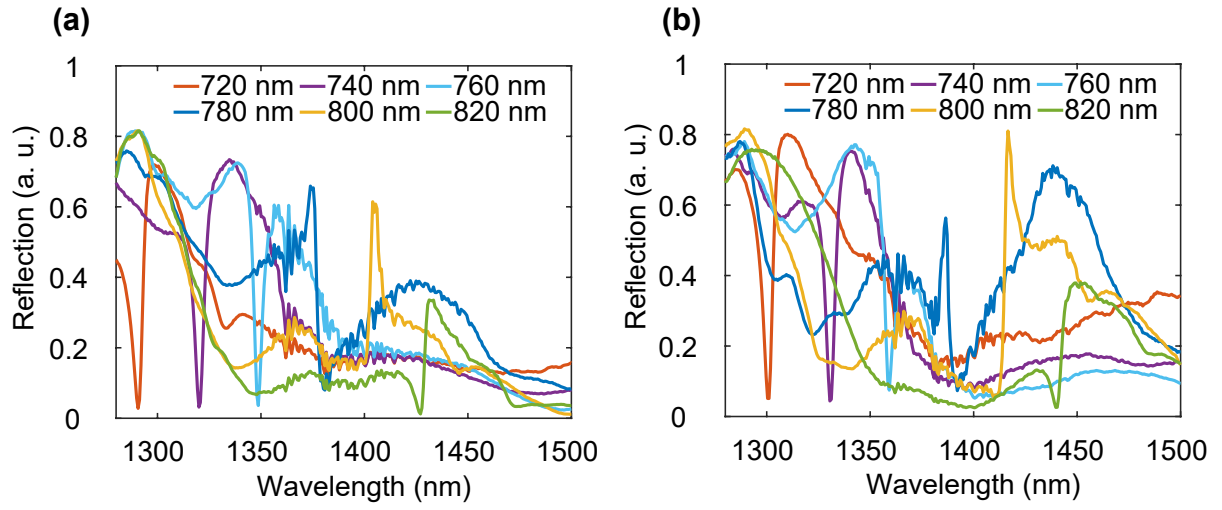

**Figure S7:** Experimental reflection spectra of bowtie in suspended CBG with different  $P$ 's under (a) z-polarized and (b) y-polarized illumination.

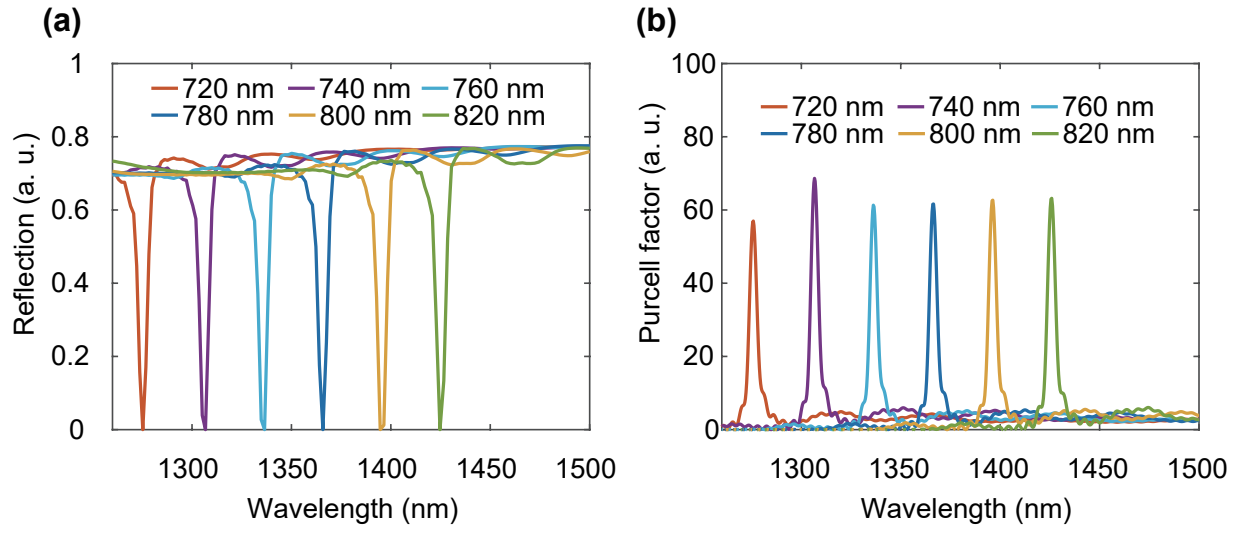

**Figure S8:** (a) Simulated reflection spectra of the bowtie in suspended CBG under z-polarized illumination and (b) the corresponding Purcell factors.

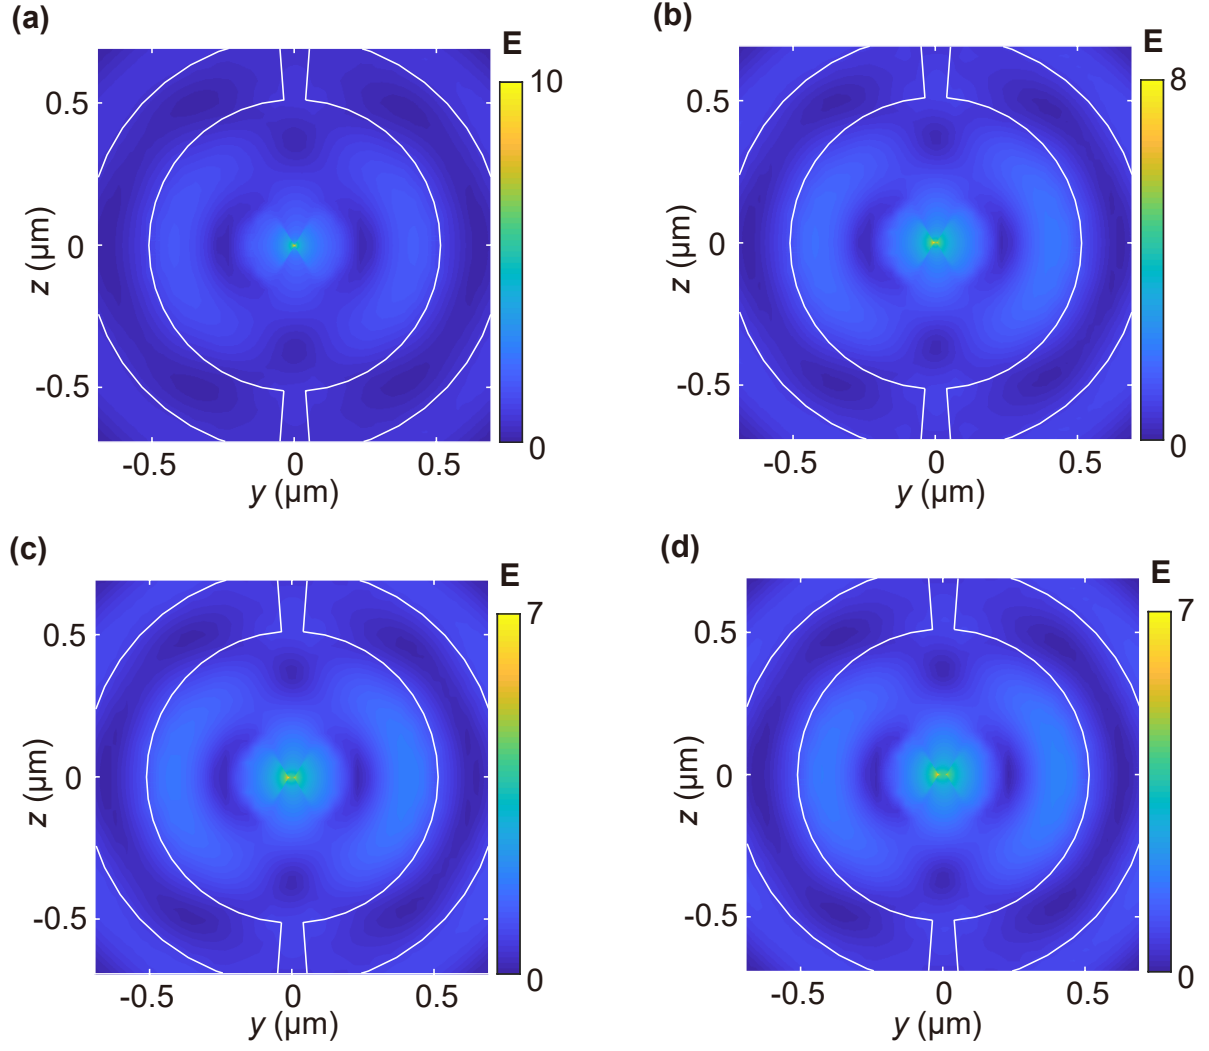

**Figure S9:** Simulated electric field distributions of the bowtie in suspended CBG structures with gap sizes of (a) 0 nm, (b) 10 nm, (c) 20 nm, and (d) 30 nm.

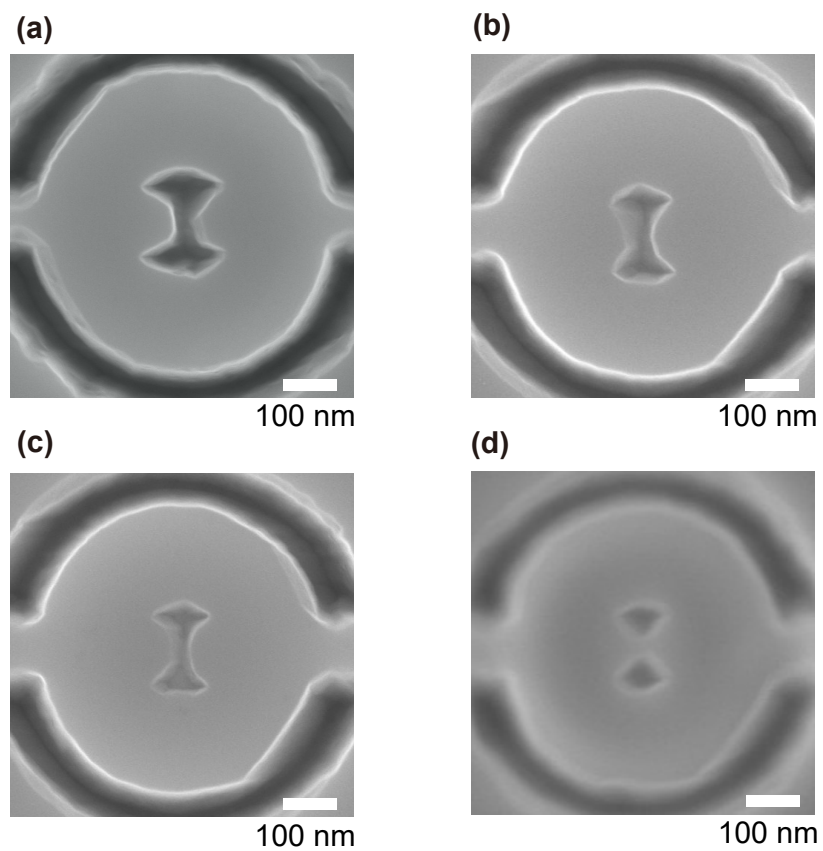

**Figure S10:** The fabricated sample is designed with a minimum gap of 20 nm. Due to the inclined etching angle, the actual separation at the tip of the sloped sidewalls is effectively reduced to 0 nm.



**Table S1: Experimental parameters and input power levels.** The table lists the laser excitation parameters, including wavelength, repetition rate, and pulse width, as well as the calculated spot diameter and peak power.

| Parameter | Wavelength<br>(nm) | Rep. rate<br>(MHz) | Pulse length<br>(ps) | Avg. power<br>(mW) | NA<br>– | Spot diameter<br>( $\mu\text{m}$ ) | Peak power<br>(mW)              |
|-----------|--------------------|--------------------|----------------------|--------------------|---------|------------------------------------|---------------------------------|
| Symbol    | $\lambda$          | $\nu$              | $\tau$               | $P_{\text{FH}}$    | –       | $\delta$                           | $\hat{P}_{\text{FH}}$           |
| Formula   | N/A                | N/A                | N/A                  | N/A                | N/A     | $\frac{1.22\lambda}{\text{NA}}$    | $\frac{P_{\text{FH}}}{\nu\tau}$ |
| Value     | 1310               | 20                 | 220                  | 0.21               | 0.65    | 2.46                               | 47.7                            |

**Table S2: SHG conversion efficiency** The table lists SHG related parameters in our experiment including SHG power, peak power, conversion efficiency, peak SHG efficiency, and normalized efficiency.

| Parameter | SHG Power<br>(nW)       | SHG Peak Power<br>(W)                 | Max. conv. eff.<br>–                  | Peak SHG eff.<br>( $\text{W}^{-1}$ )                | Normalized SHG eff.<br>( $\text{cm}^2/\text{GW}$ )                                        |
|-----------|-------------------------|---------------------------------------|---------------------------------------|-----------------------------------------------------|-------------------------------------------------------------------------------------------|
| Symbol    | $P_{\text{SH}}$         | $\hat{P}_{\text{SH}}$                 | $\eta_{\text{SHG}}$                   | $\gamma_{\text{SHG}}$                               | $\eta_{\text{norm}}$                                                                      |
| Formula   | $N \cdot E_{\text{ph}}$ | $\frac{\hat{P}_{\text{SH}}}{\nu\tau}$ | $\frac{P_{\text{SH}}}{P_{\text{FH}}}$ | $\frac{\hat{P}_{\text{SH}}}{\hat{P}_{\text{FH}}^2}$ | $\frac{\eta_{\text{SHG}} \cdot \pi \left(\frac{\delta}{2}\right)^2}{\hat{P}_{\text{FH}}}$ |
| Value     | 1.8                     | $4.09 \times 10^{-7}$                 | $8.6 \times 10^{-6}$                  | $1.78 \times 10^{-4}$                               | $0.85 \times 10^{-2}$                                                                     |

**Table S3: Comparison of nonlinear optical performance across nanophotonic platforms.** This table compares the Q factor, mode volume, SHG efficiency, and normalized SHG efficiency of various reported nanophotonic resonators.

| Type        | $Q$ factor | Mode volume           | Wavelength | SHG efficiency        | Norm. SHG efficiency   | Reference                                                     |
|-------------|------------|-----------------------|------------|-----------------------|------------------------|---------------------------------------------------------------|
|             | –          | $(\lambda/n)^3$       | (nm)       | –                     | (cm <sup>2</sup> /GW)  |                                                               |
| This work   | ~370       | $7.58 \times 10^{-4}$ | 1310       | $8.6 \times 10^{-6}$  | $0.85 \times 10^{-2}$  | N/A                                                           |
| Plasmonic   | ~20        | $6.45 \times 10^{-6}$ | 1550       | $6.4 \times 10^{-9}$  | $7.88 \times 10^{-9}$  | Nat. Nanotechnol. <b>10</b> , 412 (2015) <sup>10</sup>        |
| Plasmonic   | ~10        | $1.63 \times 10^{-7}$ | 850        | $0.87 \times 10^{-6}$ | $9.92 \times 10^{-8}$  | Nat. Commun. <b>12</b> , 4326 (2021) <sup>14</sup>            |
| Plasmonic   | ~30        | $6 \times 10^{-6}$    | 1560       | $1.3 \times 10^{-7}$  | $1.23 \times 10^{-7}$  | Opt. Express <b>32</b> , 13140 (2024) <sup>15</sup>           |
| Plasmonic   | ~10        | $1.3 \times 10^{-7}$  | 1560       | N/A                   | N/A                    | Nano Lett. <b>15</b> , 4102 (2015) <sup>11</sup>              |
| Plasmonic   | ~5         | $5 \times 10^{-2}$    | 650        | $3.7 \times 10^{-12}$ | $2.8 \times 10^{-13}$  | Light Sci. Appl. <b>7</b> , 49 (2018) <sup>16</sup>           |
| Plasmonic   | N/A        | $5 \times 10^{-4}$    | 800–1300   | $1.13 \times 10^{-6}$ | $1.29 \times 10^{-7}$  | Nat. Commun. <b>12</b> , 6425 (2021) <sup>17</sup>            |
| Plasmonic   | ~10        | $1.4 \times 10^{-7}$  | 725–800    | $2 \times 10^{-9}$    | $1.8 \times 10^{-8}$   | ACS Photonics <b>10</b> , 1529 (2023) <sup>18</sup>           |
| BIC         | ~4000      | 0.5–2                 | 1200       | $4 \times 10^{-5}$    | $4 \times 10^{-3}$     | Nano Lett. <b>20</b> , 8745 (2020) <sup>23</sup>              |
| BIC         | ~188       | ~0.07                 | 1570       | $1.18 \times 10^{-5}$ | $1.6 \times 10^{-4}$   | Science <b>367</b> , 288 (2020) <sup>24</sup>                 |
| PhC         | ~100       | ~100                  | 742        | $2.8 \times 10^{-3}$  | $6.7 \times 10^{-4}$   | Adv. Funct. Mater. <b>33</b> , 2308484 (2023) <sup>19</sup>   |
| PhC         | ~100       | ~100                  | 843        | $1 \times 10^{-3}$    | $4.7 \times 10^{-4}$   | Adv. Opt. Mater. <b>13</b> , 2402686 (2023) <sup>20</sup>     |
| PhC         | 8000       | ~1.18                 | 1510       | $5.21 \times 10^{-9}$ | N/A                    | Nanophotonics <b>13</b> , 4029 (2024) <sup>21</sup>           |
| PhC         | 5600       | ~0.3                  | 1500       | $3 \times 10^{-11}$   | $4.4 \times 10^{-9}$   | Nano Lett. <b>24</b> , 11327 (2024) <sup>22</sup>             |
| Anapole     | ~10        | ~7                    | 1440       | $1.18 \times 10^{-8}$ | $6.1 \times 10^{-10}$  | Adv. Mater. <b>37</b> , 2418257 (2024) <sup>31</sup>          |
| Anapole     | ~5         | ~1.17                 | ~800       | $1.9 \times 10^{-5}$  | $1.9 \times 10^{-5}$   | Nano Lett. <b>18</b> , 3695 (2018) <sup>29</sup>              |
| Mie         | ~20        | ~0.15                 | 1400       | $3.4 \times 10^{-10}$ | $1.87 \times 10^{-12}$ | Nat. Commun. <b>12</b> , 5597 (2021) <sup>25</sup>            |
| Mie         | ~10        | ~1.58                 | 900        | $5 \times 10^{-8}$    | $3.77 \times 10^{-9}$  | Laser Photonics Rev. <b>16</b> , 2100604 (2022) <sup>26</sup> |
| Mie         | ~10        | ~10                   | 820        | $2 \times 10^{-6}$    | $9.75 \times 10^{-7}$  | Laser Photonics Rev. <b>15</b> , 2000521 (2021) <sup>27</sup> |
| Metasurface | ~75        | ~1.38                 | 940        | $2 \times 10^{-4}$    | $8.3 \times 10^{-5}$   | Nano Lett. <b>22</b> , 9652 (2022) <sup>40</sup>              |
| GMR         | ~4000      | ~110                  | 1550       | $3 \times 10^{-8}$    | $2.03 \times 10^{-5}$  | Phys. Rev. Lett. <b>127</b> , 153901 (2021) <sup>28</sup>     |
| CBG/EBG     | ~260       | ~1.12                 | 1310       | $2.32 \times 10^{-5}$ | $1.21 \times 10^{-2}$  | Nano Lett. <b>24</b> , 11676 (2024) <sup>42</sup>             |

## 622 References

- 623 1. Y. Wang, *et al.*, Stable, high-performance sodium-based plasmonic devices in the near infrared.  
624 *Nature* **581** (7809), 401–405 (2020).
- 625 2. Y.-H. Ouyang, H.-Y. Luan, Z.-W. Zhao, W.-Z. Mao, R.-M. Ma, Singular dielectric nanolaser  
626 with atomic-scale field localization. *Nature* **632** (8024), 287–293 (2024).
- 627 3. W. Liu, *et al.*, Single-molecule sensing inside stereo-and regio-defined hetero-nanopores. *Nature Nanotechnology* pp. 1–9 (2024).  
628
- 629 4. E. Deist, J. A. Gerber, Y.-H. Lu, J. Zeiher, D. M. Stamper-Kurn, Superresolution microscopy  
630 of optical fields using tweezer-trapped single atoms. *Physical Review Letters* **128** (8), 083201  
631 (2022).
- 632 5. M. Kauranen, A. V. Zayats, Nonlinear plasmonics. *Nature Photonics* **6** (11), 737–748 (2012).
- 633 6. G. Li, S. Zhang, T. Zentgraf, Nonlinear photonic metasurfaces. *Nature Reviews Materials* **2** (5),  
634 1–14 (2017).
- 635 7. T. Santiago-Cruz, *et al.*, Resonant metasurfaces for generating complex quantum states. *Science*  
636 **377** (6609), 991–995 (2022).
- 637 8. J. Zhang, *et al.*, Spatially entangled photon pairs from lithium niobate nonlocal metasurfaces.  
638 *Science Advances* **8** (30), eabq4240 (2022).
- 639 9. D. K. Gramotnev, S. I. Bozhevolnyi, Plasmonics beyond the diffraction limit. *Nature photonics*  
640 **4** (2), 83–91 (2010).
- 641 10. M. Celebrano, *et al.*, Mode matching in multiresonant plasmonic nanoantennas for enhanced  
642 second harmonic generation. *Nature Nanotechnology* **10** (5), 412–417 (2015).
- 643 11. M.-K. Kim, *et al.*, Squeezing photons into a point-like space. *Nano Letters* **15** (6), 4102–4107  
644 (2015).
- 645 12. J. B. Khurgin, Ultimate limit of field confinement by surface plasmon polaritons. *Faraday*  
646 *Discussions* **178**, 109–122 (2015).

- 647 13. J. B. Khurgin, How to deal with the loss in plasmonics and metamaterials. *Nature Nanotech-*  
648 *nology* **10** (1), 2–6 (2015).
- 649 14. G.-C. Li, *et al.*, Light-induced symmetry breaking for enhancing second-harmonic generation  
650 from an ultrathin plasmonic nanocavity. *Nature Communications* **12** (1), 4326 (2021).
- 651 15. Z. Li, *et al.*, Plasmonic hotspot arrays boost second harmonic generation in thin-film lithium  
652 niobate. *Optics Express* **32** (8), 13140–13155 (2024).
- 653 16. M. Galanty, *et al.*, Second harmonic generation hotspot on a centrosymmetric smooth silver  
654 surface. *Light: Science & Applications* **7** (1), 49 (2018).
- 655 17. J. Li, *et al.*, Full-color enhanced second harmonic generation using rainbow trapping in ultrathin  
656 hyperbolic metamaterials. *Nature Communications* **12** (1), 6425 (2021).
- 657 18. T. Zhang, Q. Guo, Z. Shi, S. Zhang, H. Xu, Coherent second harmonic generation enhanced by  
658 coherent plasmon–exciton coupling in plasmonic nanocavities. *ACS Photonics* **10** (5), 1529–  
659 1537 (2023).
- 660 19. L. Qu, *et al.*, Bright second harmonic emission from photonic crystal vertical cavity. *Advanced*  
661 *Functional Materials* **33** (47), 2308484 (2023).
- 662 20. L. Bai, *et al.*, Wavelength Tunable Second Harmonic Generation from Photonic Crystal Vertical  
663 Cavities. *Advanced Optical Materials* **13** (8), 2402686 (2025).
- 664 21. Z. Liu, *et al.*, Enhanced vertical second harmonic generation from layered GaSe coupled to  
665 photonic crystal circular Bragg resonators. *Nanophotonics* **13** (21), 4029–4035 (2024).
- 666 22. X. Wang, *et al.*, Experimental demonstration of high-efficiency harmonic generation in photonic  
667 moiré superlattice microcavities. *Nano Letters* **24** (36), 11327–11333 (2024).
- 668 23. A. P. Anthur, *et al.*, Continuous wave second harmonic generation enabled by quasi-bound-  
669 states in the continuum on gallium phosphide metasurfaces. *Nano Letters* **20** (12), 8745–8751  
670 (2020).
- 671 24. K. Koshelev, *et al.*, Subwavelength dielectric resonators for nonlinear nanophotonics. *Science*  
672 **367** (6475), 288–292 (2020).

- 673 25. M. Nauman, *et al.*, Tunable unidirectional nonlinear emission from transition-metal-  
674 dichalcogenide metasurfaces. *Nature Communications* **12** (1), 5597 (2021).
- 675 26. A. A. Popkova, *et al.*, Nonlinear exciton-mie coupling in transition metal dichalcogenide  
676 nanoresonators. *Laser & Photonics Reviews* **16** (6), 2100604 (2022).
- 677 27. J. Ma, *et al.*, Nonlinear lithium niobate metasurfaces for second harmonic generation. *Laser &*  
678 *Photonics Reviews* **15** (5), 2000521 (2021).
- 679 28. S. Yuan, *et al.*, Strongly enhanced second harmonic generation in a thin film lithium niobate  
680 heterostructure cavity. *Physical Review Letters* **127** (15), 153901 (2021).
- 681 29. M. Timofeeva, *et al.*, Anapoles in free-standing III–V nanodisks enhancing second-harmonic  
682 generation. *Nano Letters* **18** (6), 3695–3702 (2018).
- 683 30. G. Zograf, *et al.*, Combining ultrahigh index with exceptional nonlinearity in resonant transition  
684 metal dichalcogenide nanodisks. *Nature Photonics* **18** (7), 751–757 (2024).
- 685 31. R. Biswas, *et al.*, Leveraging Strong Electric Field Gradients at Anapole Resonances for En-  
686 hanced Second Harmonic Generation from Molybdenum Disulfide Disks. *Advanced Materials*  
687 **37** (14), 2418257 (2025).
- 688 32. H. Shim, F. Monticone, O. D. Miller, Fundamental limits to the refractive index of transparent  
689 optical materials. *Advanced Materials* **33** (43), 2103946 (2021).
- 690 33. J. B. Khurgin, Expanding the photonic palette: exploring high index materials. *ACS Photonics*  
691 **9** (3), 743–751 (2022).
- 692 34. H. Choi, M. Heuck, D. Englund, Self-similar nanocavity design with ultrasmall mode volume  
693 for single-photon nonlinearities. *Physical Review Letters* **118** (22), 223605 (2017).
- 694 35. S. Hu, *et al.*, Experimental realization of deep-subwavelength confinement in dielectric optical  
695 resonators. *Science Advances* **4** (8), eaat2355 (2018).
- 696 36. M. Albrechtsen, *et al.*, Nanometer-scale photon confinement in topology-optimized dielectric  
697 cavities. *Nature Communications* **13** (1), 6281 (2022).

- 698 37. A. N. Babar, *et al.*, Self-assembled photonic cavities with atomic-scale confinement. *Nature*  
699 **624** (7990), 57–63 (2023).
- 700 38. S. Gafsi, J. D. Ryckman, All-Dielectric Metawaveguide Ring Resonators with Deeply Sub-  
701 Diffractive Mode Volumes. *Laser & Photonics Reviews* p. 2401579 (2025).
- 702 39. C. Wang, *et al.*, Integrated lithium niobate electro-optic modulators operating at CMOS-  
703 compatible voltages. *Nature* **562** (7725), 101–104 (2018).
- 704 40. L. Qu, *et al.*, Giant second harmonic generation from membrane metasurfaces. *Nano Letters*  
705 **22** (23), 9652–9657 (2022).
- 706 41. A. Boes, *et al.*, Lithium niobate photonics: Unlocking the electromagnetic spectrum. *Science*  
707 **379** (6627), eabj4396 (2023).
- 708 42. Z. Li, *et al.*, Enhanced second-harmonic generation in thin-film lithium niobate circular Bragg  
709 nanocavity. *Nano Letters* **24** (37), 11676–11682 (2024).
- 710 43. H. Wang, *et al.*, Towards optimal single-photon sources from polarized microcavities. *Nature*  
711 *Photonics* **13** (11), 770–775 (2019).
- 712 44. O. Iff, *et al.*, Purcell-enhanced single photon source based on a deterministically placed WSe<sub>2</sub>  
713 monolayer quantum dot in a circular Bragg grating cavity. *Nano Letters* **21** (11), 4715–4720  
714 (2021).
- 715 45. A. Rodriguez, M. Soljačić, J. D. Joannopoulos, S. G. Johnson,  $\chi$  (2) and  $\chi$  (3) harmonic  
716 generation at a critical power in inhomogeneous doubly resonant cavities. *Optics Express*  
717 **15** (12), 7303–7318 (2007).
- 718 46. X. Zhang, *et al.*, Symmetry-breaking-induced nonlinear optics at a microcavity surface. *Nature*  
719 *Photonics* **13** (1), 21–24 (2019).
